# Supplementary material for: In vitro evaluations on canine monocyte-derived dendritic cells of a nanoparticles delivery system for vaccine antigen against Echinococcus granulosus
Source: PubMed Central journal article supplement (PMC7043750; doi:10.1371/journal.pone.0229121), 2020-02-26

**Figure S3:** Example of cytometry profiles of CD80, MHC II, CD40 and CD86 expression obtained on cMoDCs 24h after of challenge with (A) PBS, (B) LPS, (C) Blank-NPs, (D) *EgTrp* alone, (E) *EgTrp*-NPs, (F) NPs-MPLA and (G) *EgTrp*-NPs-MPLA.

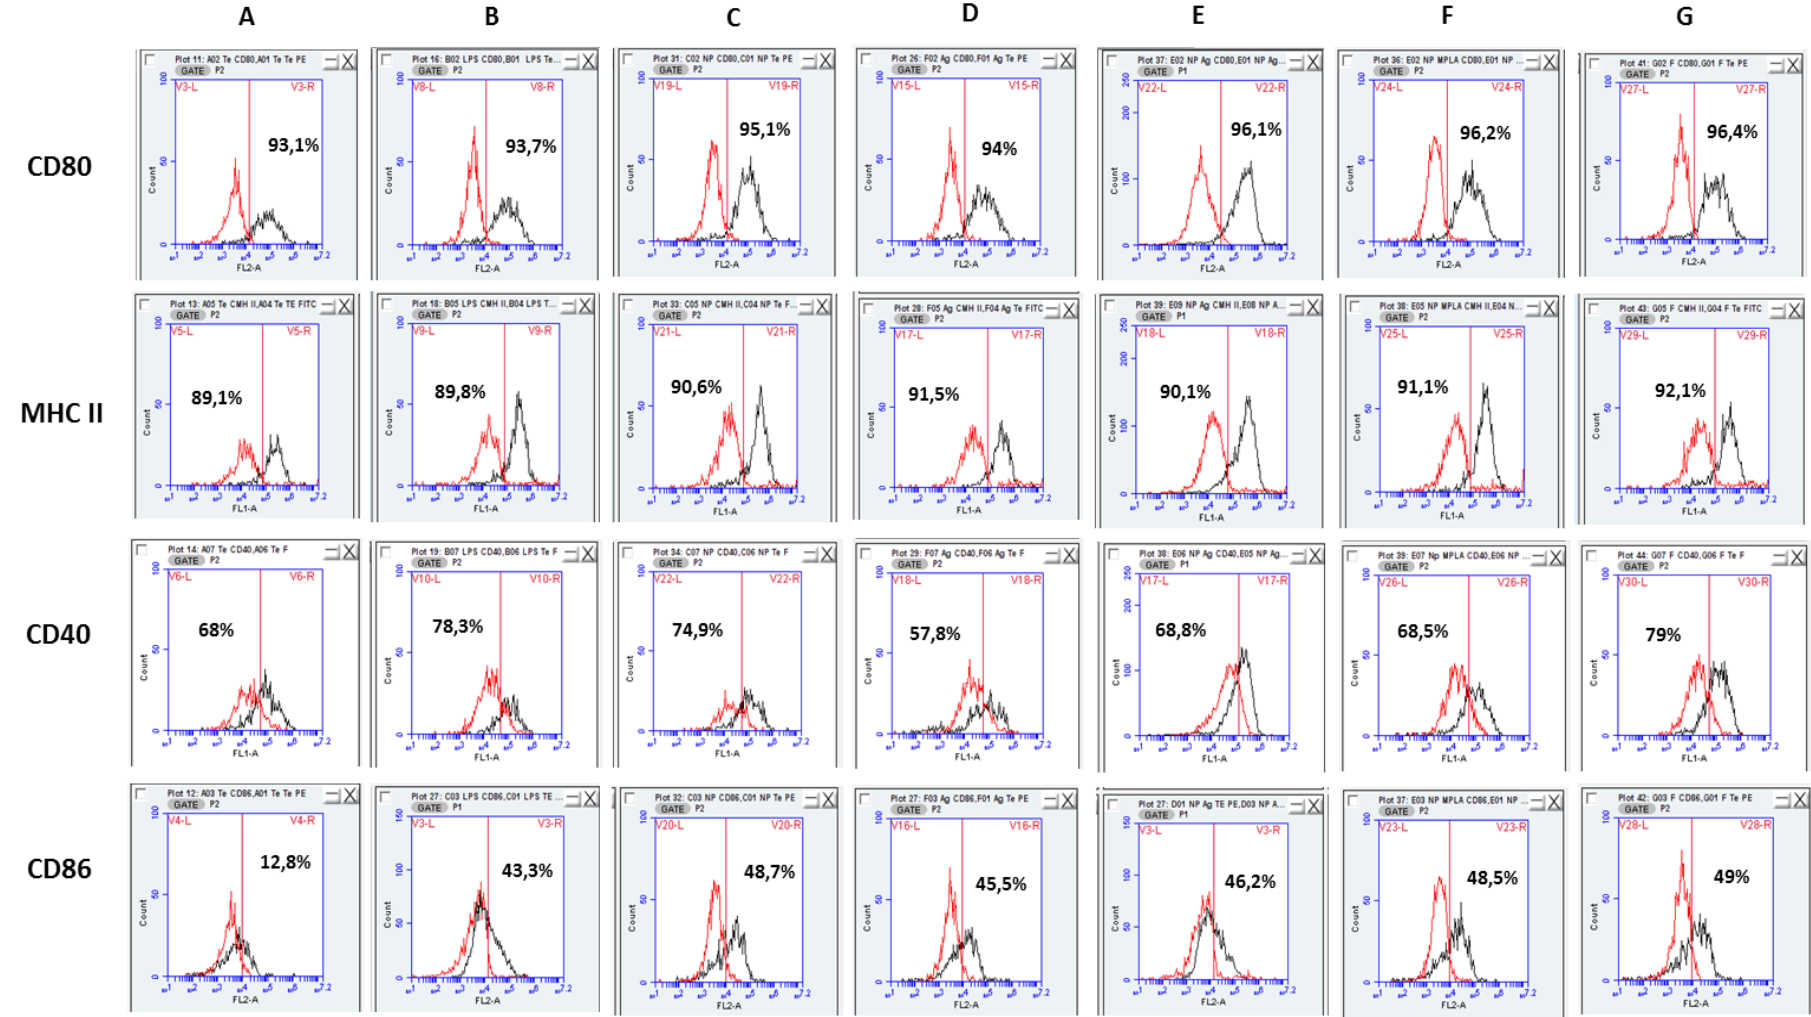

Supplement: pone.0229121.s003.pdf [file pone.0229121.s003.pdf]
